# Supplementary material
Source: Royal Society of Chemistry journal article supplement (doi:10.1039/d6nj00362a)
Supplement: d6nj00362a1.pdf [file d6nj00362a1.pdf]

## **A Turn-On Bis-Hydrazone Fluorescent Chemosensor for Selective Cd<sup>2+</sup> Detection: Synthesis, Structural Insights, and Theoretical Validation**

Suman Adhikari<sup>a\*</sup>, Sourav Nath<sup>a,b</sup>, Koushik Saha<sup>c</sup>, Nabajyoti Baildya<sup>d</sup>, Werner Kaminsky<sup>e</sup>,  
Malavika S Kumar<sup>f</sup>, Subhadip Roy<sup>g</sup>, Avijit Kumar Das<sup>f\*</sup>

<sup>a</sup>*Department of Chemistry, Govt. Degree College, Dharmanagar, Tripura(N)-799253, India.*

<sup>b</sup>*Department of Chemistry and Vivekananda Centre for Research, Ramakrishna Mission Residential College, Narendrapur, Kolkata-700103, India.*

<sup>c</sup>*Department of Chemistry, Jadavpur University, Kolkata 700032, West Bengal, India.*

<sup>d</sup>*Department of Chemistry, Milki High School, Milki, Malda-732209, India.*

<sup>e</sup>*Department of Chemistry, University of Washington, Seattle, Washington 98195, United States*

<sup>f</sup>*Department of Chemistry, Christ University, Hosur Road, Bangalore, Karnataka, 560029 India*

<sup>g</sup>*Department of Chemistry, The ICFAI University Tripura, Kamalghat, Mohanpur, Agartala, 799210, Tripura, India.*

## Experimental

### *X-ray Crystallography*

A colorless prism, measuring 0.30 x 0.12 x 0.06 mm<sup>3</sup> was mounted on a loop with oil. Data was collected at -143°C on a Nonius Kappa CCD FR590 single crystal X-ray diffractometer, Mo-radiation. Crystal-to-detector distance was 40 mm and exposure time was 60 seconds per degree for all sets. The scan width was 1°. Data collection was 99.8% complete to 25° in  $\theta$ . A total of 30813 partial and complete reflections were collected covering the indices,  $-26 \leq h \leq 26$ ,  $-11 \leq k \leq 11$ ,  $-14 \leq l \leq 14$ . A total of 8376 merged and 2360 symmetry independent reflections were collected. The data was integrated and scaled using hkl-SCALEPACK [1]. This program applies a multiplicative correction factor (S) to the observed intensities (I) and has the following form:

$$S = (e^{-2B(\sin^2 \theta) / \lambda^2}) / \text{scale}$$

S is calculated from the scale and the B factor determined for each frame and is then applied to I to give the corrected intensity ( $I_{\text{corr}}$ ). Solution by direct methods (SHELXT) [2] produced a complete heavy atom phasing model consistent with the proposed structure. The structure was completed by difference Fourier synthesis with SHELXL [3, 4] Scattering factors are from Waasmair and Kirfel [5]. Hydrogen atoms were placed in geometrically idealised positions and constrained to ride on their parent atoms with C–H distances in the range 0.95-1.00 Angstrom. Isotropic thermal parameters  $U_{\text{eq}}$  were fixed such that they were 1.2 $U_{\text{eq}}$  of their parent atom  $U_{\text{eq}}$  for CH's and 1.5 $U_{\text{eq}}$  of their parent atom  $U_{\text{eq}}$  in case of methyl groups. All non-hydrogen atoms were refined anisotropically by full-matrix least-squares.

### *Experimental for fluorescence studies*

For fluorescence titration experiments, a stock solution of the probe L ( $2.0 \times 10^{-5}$  M) was prepared in a CH<sub>3</sub>CN–HEPES buffer mixture (9:1, v/v) at pH 7.4 and 25 °C. Stock solutions of potential interfering metal ions (Al<sup>3+</sup>, Cd<sup>2+</sup>, Fe<sup>3+</sup>, Fe<sup>2+</sup>, Hg<sup>2+</sup>, Co<sup>2+</sup>, Mn<sup>2+</sup>, Cu<sup>2+</sup>, Ni<sup>2+</sup>, Pb<sup>2+</sup>, and Zn<sup>2+</sup>) were prepared separately at a concentration of  $2.0 \times 10^{-4}$  M. Initially, the sensor solution was prepared by dissolving probe **1** in 2 mL of acetonitrile, followed by the gradual addition of the corresponding guest analytes in increasing concentrations. Solutions containing a fixed concentration of the

sensor and varying concentrations of analytes were prepared individually, and their fluorescence spectra were recorded accordingly.

### **Theoretical Methods**

Geometry optimization of the bis hydrazone-based probe **1** and Cd(II) complex was performed by applying density functional theory using Gaussian 09 [6]. B3LYP hybrid functional [7] with 6-31+G(d) basis set for non-metal and LANL2DZ basis set with effective core potential for metal (Cd) was applied to offer the precise geometry of the crystal. The UV-Vis spectra with 30 singlet excitations were performed for the bis hydrazone-based probe **1** and Cd(II) complex. The structure of the complex was confirmed by frequency calculations to their true minima.

### **Topological analysis of the crystal packing**

Taking into account all intermolecular contacts during simplification procedure, one can obtain a description of the molecular packing. Using the subroutine implemented in ToposPro, different subnets can be obtained from the underlying net that contains the edges of a weight no less than a specified value. The standard representation of the Coulomb or vdW-bonded structure resulted in the 2-nodal net of the unknown topological type with point symbol for net:  $\{3^{18}.4^{10}\}_2\{3^{90}.4^{214}.5^{73}.6\}$  (**Fig. S5**).

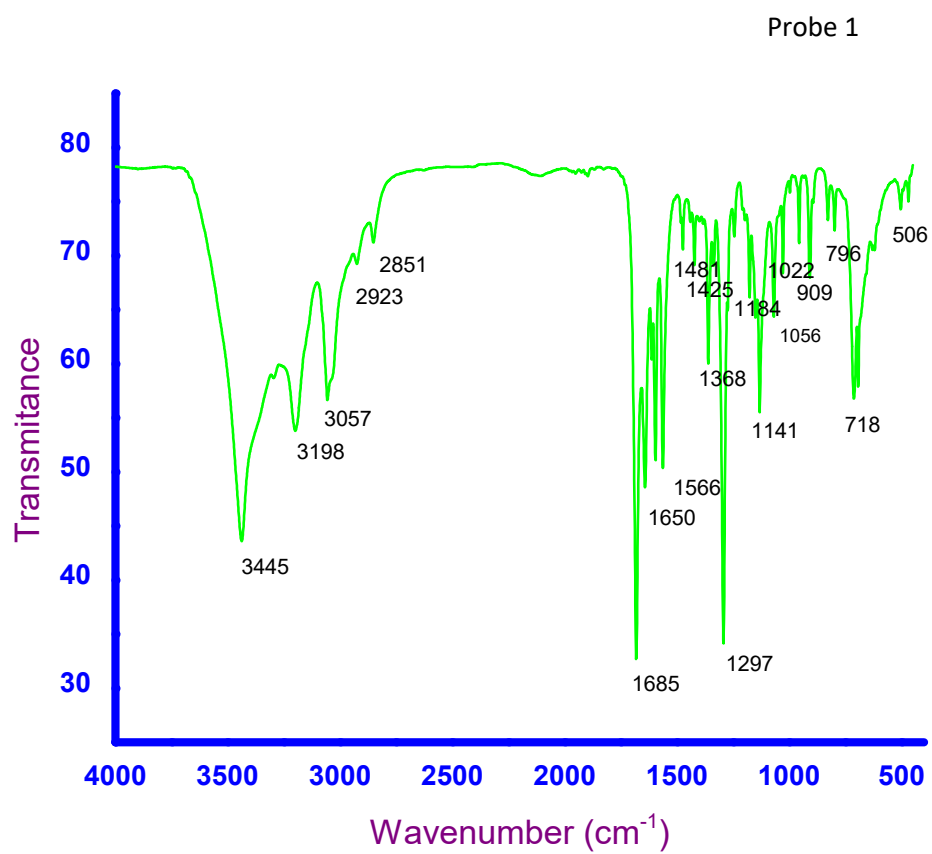

**Fig. S1.** FT-IR spectrum of bis hydrazone-based probe 1.

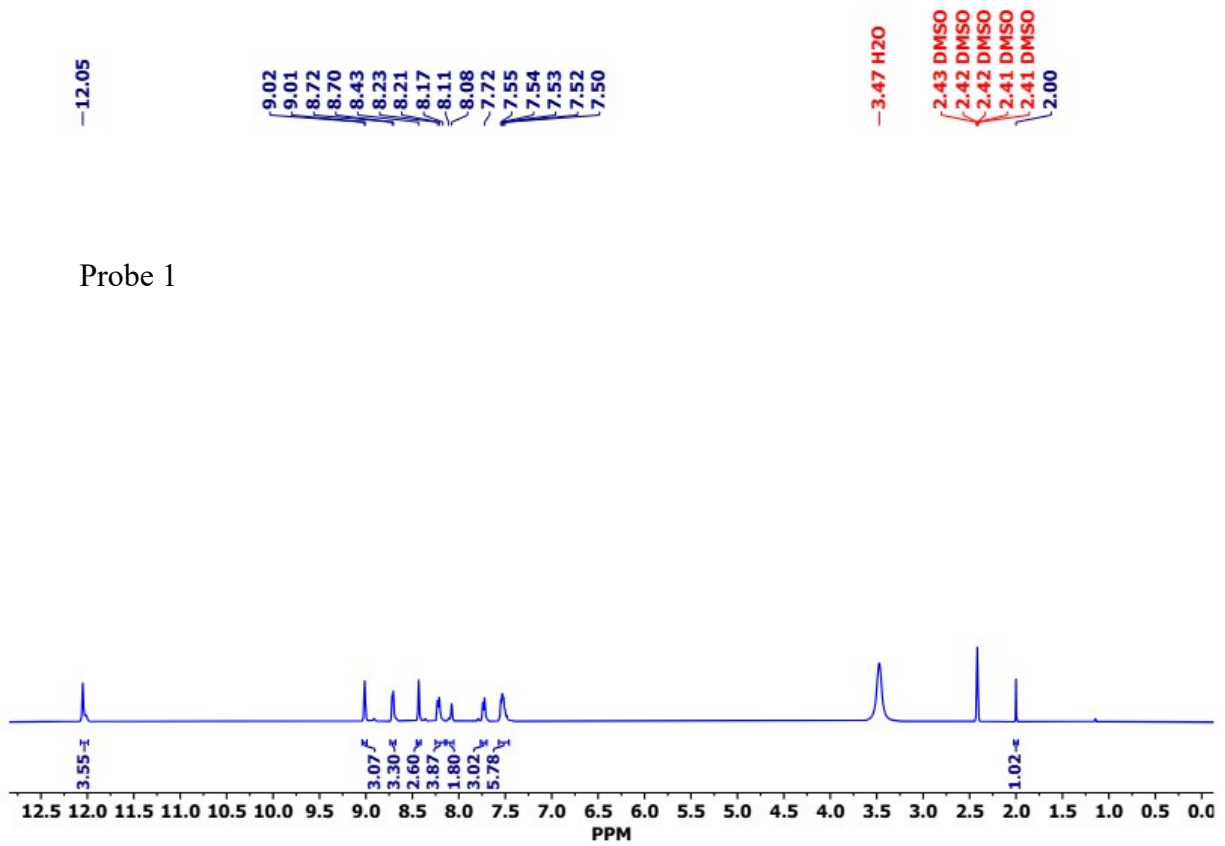

Probe 1

Fig. S2.  $^1\text{H}$  NMR spectrum of bis hydrazone-based probe **1** in  $\text{DMSO-}d_6$ .

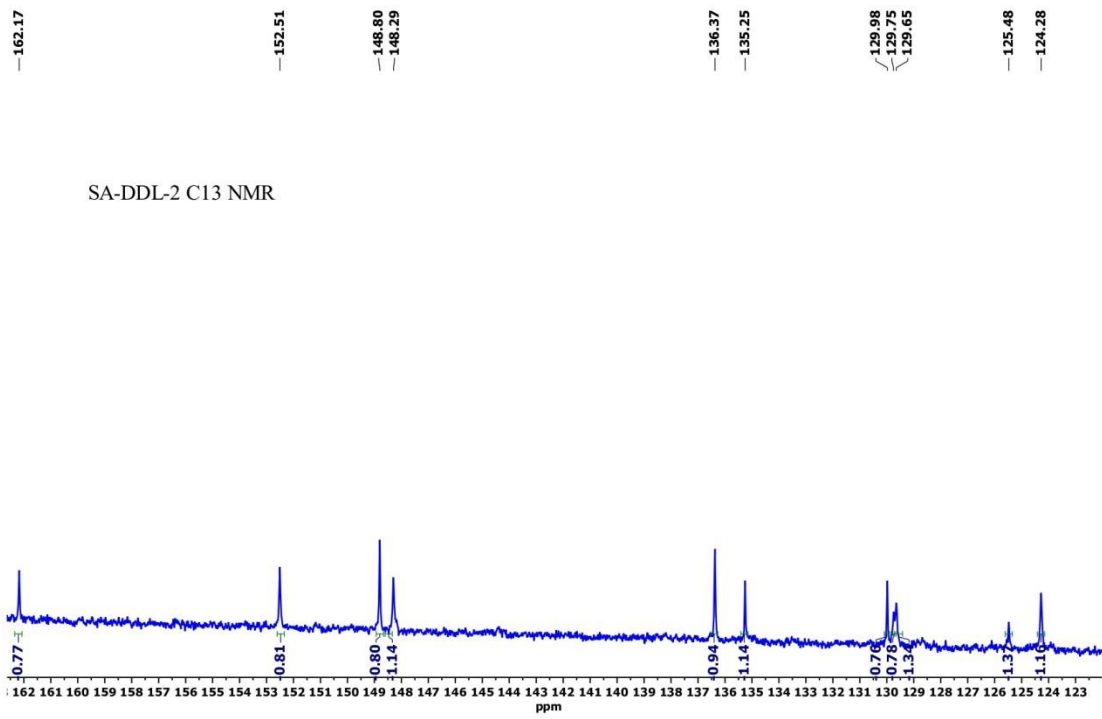

**Fig. S3.**  $^{13}\text{C}$  NMR spectrum of bis hydrazone-based probe **1** in  $\text{DMSO-}d_6$ .

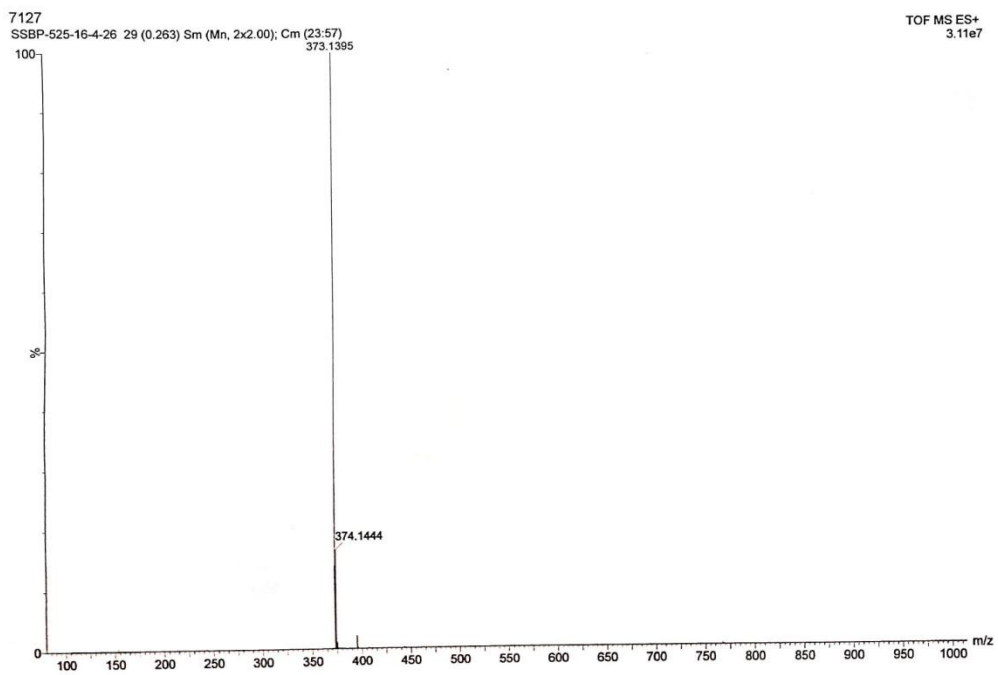

**Fig. S4.** HRMS of bis hydrazone-based probe 1.

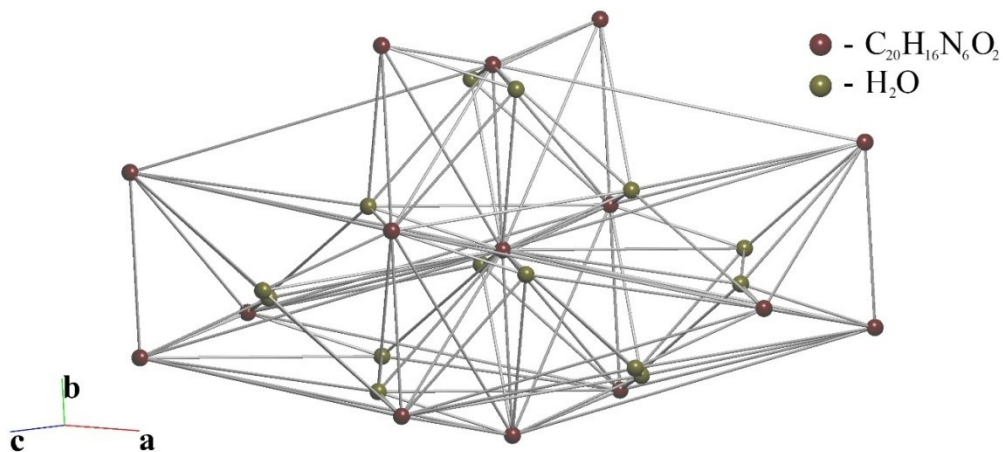

**Fig. S5.** 8,28-c net in standard representation of Coulomb or vdW-bonded molecular structure.

Having applied the multilevel analysis, we obtain the following order of the subnets that describe the packing of the structure on different levels of solid angle ( $\Omega_i$ , %) (**Table S4**). **Fig. S5** presents the formation of a 8,28-c net depending on the value of the solid angle. This is a possible mechanism for the formation of the final structure.

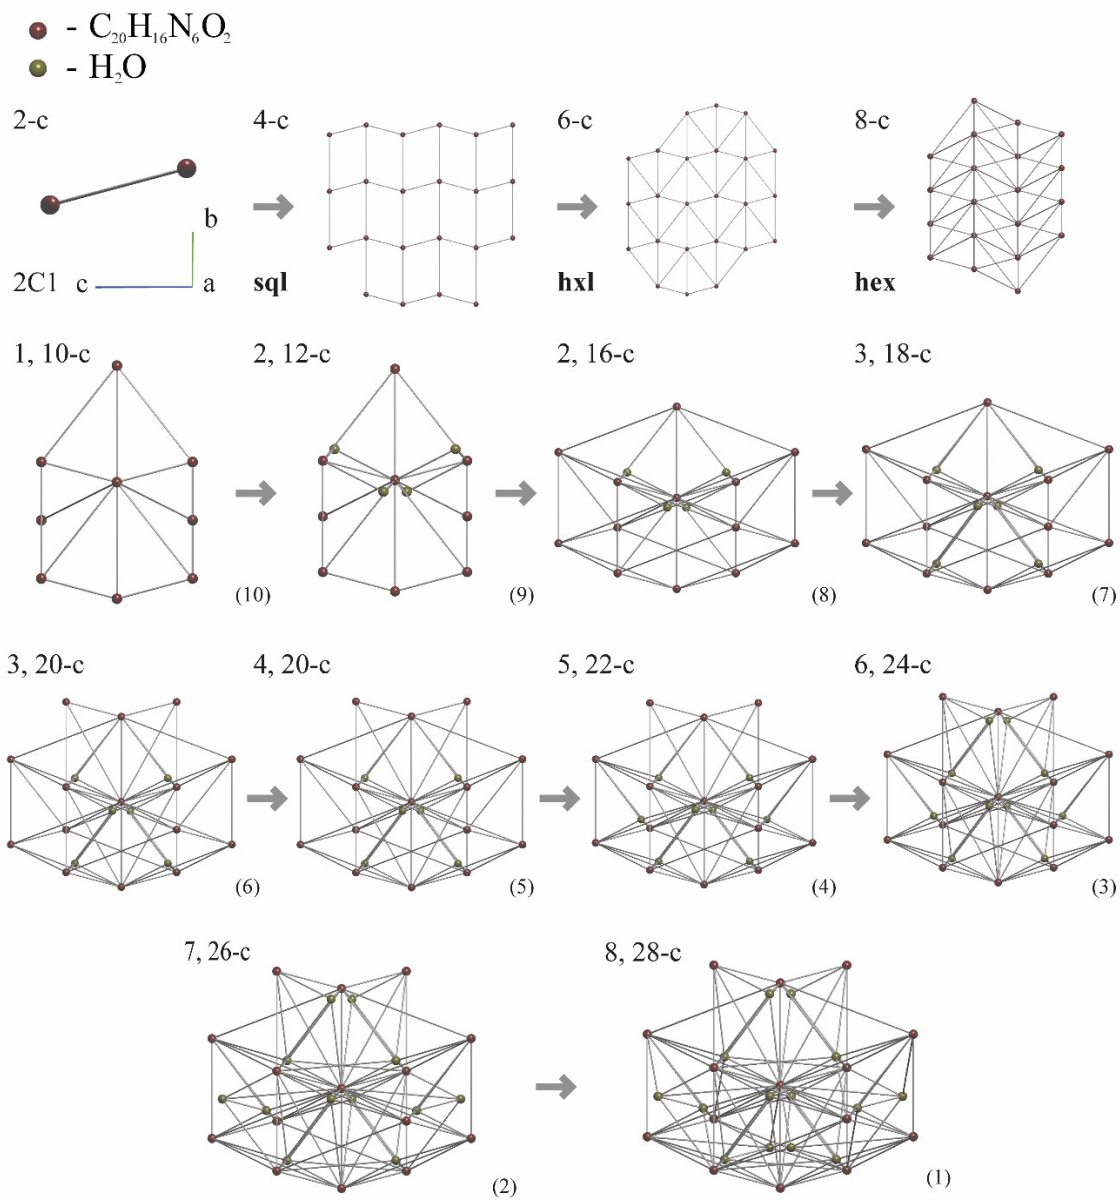

**Fig. S6.** Order of the subnets that describe the packing of the structure on different levels of  $\Omega_i$ .

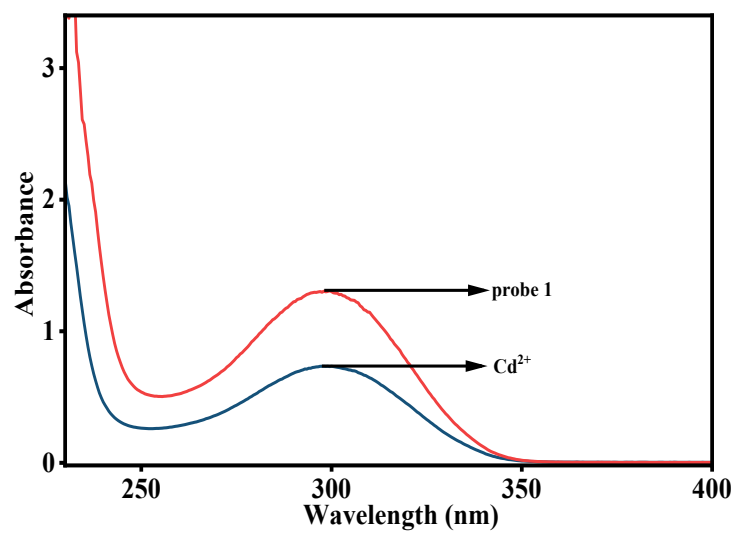

**Fig. S7.** UV-Vis spectra of probe **1** ( $c = 20 \mu\text{M}$ ) (red line) and probe **1** with  $\text{Cd}^{2+}$  ( $c = 200 \mu\text{M}$ ) (blue line).

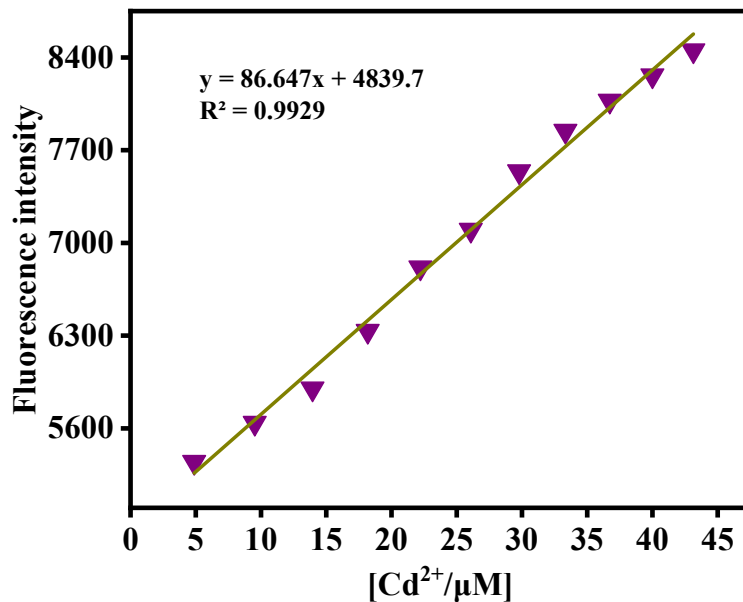

**Fig. S8.** Changes of fluorescence intensity of probe **1** as a function of [Cd<sup>2+</sup>] at 420 nm.

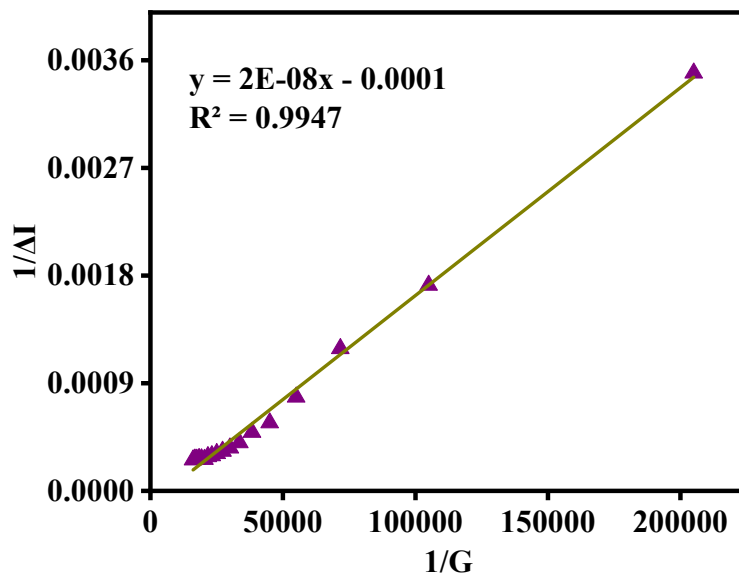

**Fig. S9.** Benesi–Hildebrand plot from fluorescence titration data of probe **1** ( $c = 20 \mu\text{M}$ ) with Cd<sup>2+</sup>.

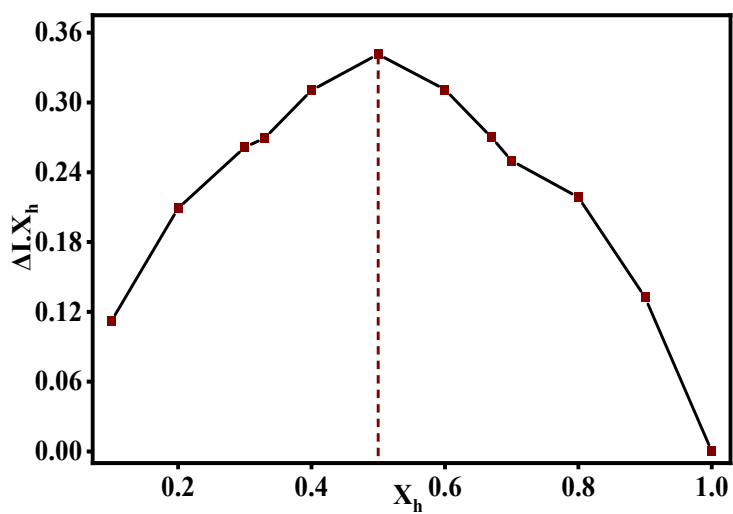

Fig. S10. Jobs plot analysis of probe 1 with  $\text{Cd}^{2+}$

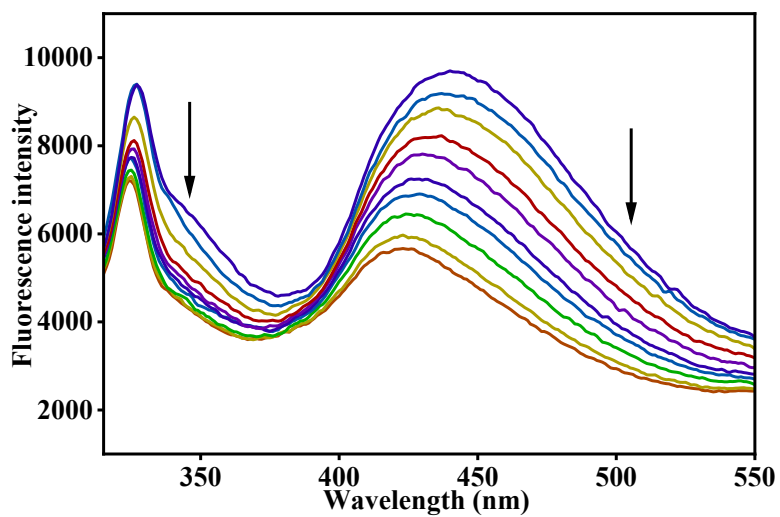

Fig. S11. Reversibility studies of probe 1- $\text{Cd}^{2+}$  with EDTA.

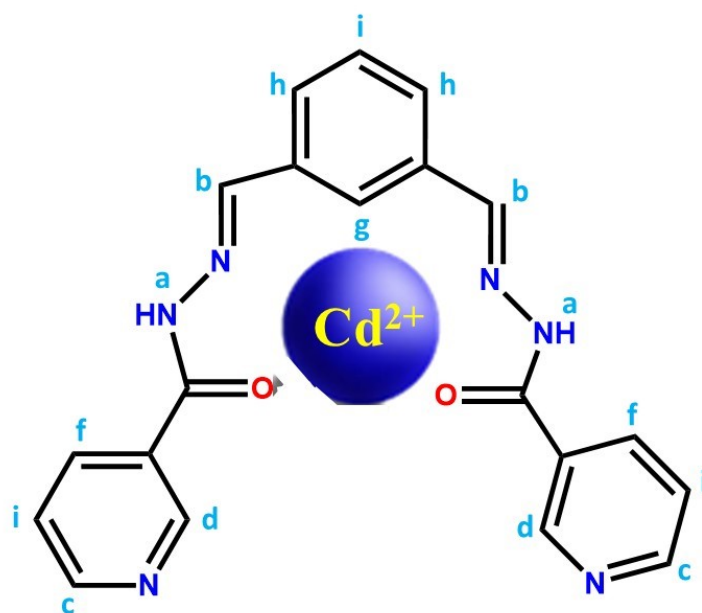

**Fig. S12.** Probable binding interactions of probe 1 with Cd<sup>2+</sup>.

| <b>Table S1.</b> Crystal data and structure refinement for probe <b>1</b> . |                                                               |
|-----------------------------------------------------------------------------|---------------------------------------------------------------|
| Identification code                                                         | <b>1</b>                                                      |
| Empirical formula                                                           | C <sub>20</sub> H <sub>20</sub> N <sub>6</sub> O <sub>4</sub> |
| Formula weight                                                              | 408.420                                                       |
| Temperature/K                                                               | 100.15                                                        |
| Crystal system                                                              | monoclinic                                                    |
| Space group                                                                 | C2/c                                                          |
| a/Å                                                                         | 19.9418(11)                                                   |
| b/Å                                                                         | 8.6405(3)                                                     |
| c/Å                                                                         | 11.5476(5)                                                    |
| α/°                                                                         | 90                                                            |
| β/°                                                                         | 104.228(6)                                                    |
| γ/°                                                                         | 90                                                            |
| Volume/Å <sup>3</sup>                                                       | 1928.70(16)                                                   |
| Z                                                                           | 4                                                             |
| ρ <sub>calc</sub> /g/cm <sup>3</sup>                                        | 1.407                                                         |
| μ/mm <sup>-1</sup>                                                          | 0.102                                                         |
| F(000)                                                                      | 856.6                                                         |
| Crystal size/mm <sup>3</sup>                                                | 0.3 × 0.12 × 0.06                                             |
| Radiation                                                                   | Mo Kα (λ = 0.71073)                                           |
| 2θ range for data collection/°                                              | 4.22 to 56.54                                                 |
| Index ranges                                                                | -26 ≤ h ≤ 26, -11 ≤ k ≤ 11, -14 ≤ l ≤ 14                      |
| Reflections collected                                                       | 8376                                                          |
| Independent reflections                                                     | 2360 [R <sub>int</sub> = 0.0812, R <sub>sigma</sub> = 0.0672] |
| Data/restraints/parameters                                                  | 2360/0/149                                                    |
| Goodness-of-fit on F <sup>2</sup>                                           | 1.007                                                         |
| Final R indexes [I ≥ 2σ (I)]                                                | R <sub>1</sub> = 0.0485, wR <sub>2</sub> = 0.1128             |
| Final R indexes [all data]                                                  | R <sub>1</sub> = 0.0874, wR <sub>2</sub> = 0.1332             |
| Largest diff. peak/hole / e Å <sup>-3</sup>                                 | 0.49/-0.51                                                    |

**Table S2.** Bond lengths for probe **1**.

| Atom | Atom            | Length/Å   | Atom | Atom | Length/Å   |
|------|-----------------|------------|------|------|------------|
| C1   | C2 <sup>1</sup> | 1.387(2)   | C6   | O1   | 1.2332(18) |
| C1   | C2              | 1.387(2)   | C7   | C8   | 1.395(2)   |
| C2   | C3              | 1.398(2)   | C7   | C11  | 1.390(2)   |
| C3   | C4 <sup>1</sup> | 1.3964(19) | C8   | C9   | 1.389(2)   |
| C3   | C5              | 1.470(2)   | C9   | C10  | 1.377(2)   |
| C5   | N1              | 1.276(2)   | C10  | N3   | 1.340(2)   |
| C6   | C7              | 1.499(2)   | C11  | N3   | 1.337(2)   |
| C6   | N2              | 1.355(2)   | N1   | N2   | 1.3854(18) |

<sup>1</sup>1-X,+Y,1/2-Z**Table S3** Bond angles for probe **1**.

| Atom            | Atom | Atom            | Angle/°    | Atom | Atom | Atom | Angle/°    |
|-----------------|------|-----------------|------------|------|------|------|------------|
| C2              | C1   | C2 <sup>1</sup> | 119.9(2)   | C8   | C7   | C6   | 125.16(15) |
| C3              | C2   | C1 <sup>1</sup> | 120.49(16) | C11  | C7   | C6   | 116.97(14) |
| C4 <sup>1</sup> | C3   | C2              | 119.27(15) | C11  | C7   | C8   | 117.87(15) |
| C5              | C3   | C2              | 119.70(14) | C9   | C8   | C7   | 118.34(15) |
| C5              | C3   | C4 <sup>1</sup> | 121.01(15) | C10  | C9   | C8   | 118.97(15) |
| C3              | C4   | C3 <sup>1</sup> | 120.5(2)   | N3   | C10  | C9   | 124.01(15) |
| N1              | C5   | C3              | 120.07(14) | N3   | C11  | C7   | 124.41(16) |
| N2              | C6   | C7              | 117.50(14) | N2   | N1   | C5   | 116.44(13) |
| O1              | C6   | C7              | 119.95(14) | N1   | N2   | C6   | 117.17(13) |
| O1              | C6   | N2              | 122.55(14) | C11  | N3   | C10  | 116.39(15) |

<sup>1</sup>1-X,+Y,1/2-Z

**Table S4.** Multilevel analysis of 1.

| No. | Node degrees | $\Omega_i$ , % | Dimensionality of net | Topological type                                                                 |
|-----|--------------|----------------|-----------------------|----------------------------------------------------------------------------------|
| 1   | 8,28-c       | 0.21           | 3D                    | New topology with point symbol $\{3^{18}.4^{10}\}_2\{3^{90}.4^{214}.5^{73}.6\}$  |
| 2   | 7,26-c       | 0.26           | 3D                    | New topology with point symbol $\{3^{13}.4^7.5\}_2\{3^{76}.4^{188}.5^{59}.6^2\}$ |
| 3   | 6,24-c       | 1.17           | 3D                    | New topology with point symbol $\{3^{66}.4^{160}.5^{49}.6\} \{3^9.4^4.5^2\}_2$   |
| 4   | 5,22-c       | 1.26           | 3D                    | New topology with point symbol $\{3^{54}.4^{124}.5^{51}.6^2\} \{3^6.4^3.5\}_2$   |
| 5   | 4,20-c       | 1.40           | 3D                    | New topology with point symbol $\{3^3.4^2.5\}_2\{3^{42}.4^{104}.5^{43}.6\}$      |
| 6   | 3,20-c       | 2.56           | 3D                    | New topology with point symbol $\{3^3\}_2\{3^{42}.4^{100}.5^{47}.6\}$            |
| 7   | 3,18-c       | 2.72           | 3D                    | New topology with point symbol $\{3^{36}.4^{72}.5^{42}.6^3\} \{3^3\}_2$          |
| 8   | 2,16-c       | 3.37           | 3D                    | New topology with point symbol $\{3^{28}.4^{54}.5^{30}.6^8\} \{3\}_2$            |
| 9   | 2,12-c       | 3.37           | 3D                    | New topology with point symbol $\{3^{10}.4^{28}.5^{19}.6^9\} \{3\}_2$            |
| 10  | 1,10-c       | 4.02           | 3D                    | New topology with point symbol $\{0\}_2\{3^6.4^{18}.5^3.6\}$                     |
| 11  | 8-c          | 4.25           | 3D                    | <u>hex</u>                                                                       |
| 12  | 6-c          | 4.60           | 2D                    | <u>hxl</u>                                                                       |
| 13  | 4-c          | 7.53           | 2D                    | <u>sql</u>                                                                       |
| 14  | 2-c          | 11.30          | 1D                    | <u>2C1</u>                                                                       |

**Table S5:** Hydrazone-based sensors for the detection of Cd<sup>2+</sup> ions.

| Probe                                                                                                                                                         | Guest                                                  | Sensing techniques               | Sensor type                            | Binding constant                                                                            | LOD                                                                                     | References |
|---------------------------------------------------------------------------------------------------------------------------------------------------------------|--------------------------------------------------------|----------------------------------|----------------------------------------|---------------------------------------------------------------------------------------------|-----------------------------------------------------------------------------------------|------------|
| 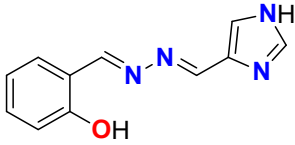                                                                             | Cd <sup>2+</sup> and F <sup>-</sup>                    | UV-vis, fluorescence titrations. | turn-on                                | 3.8 × 10 <sup>-2</sup> M (UV-Vis method)<br>5.6 × 10 <sup>-2</sup> M (Fluorescence method)  | 0.4 × 10 <sup>-10</sup> M                                                               | [8]        |
|                                                                             | Cd <sup>2+</sup> , Zn <sup>2+</sup> and F <sup>-</sup> | UV-vis, fluorescence titrations. | turn-on                                | 6.81 × 10 <sup>-4</sup> M (UV-Vis method)<br>8.3 × 10 <sup>-5</sup> M (Fluorescence method) | 0.01 nM                                                                                 | [9]        |
|  <p style="text-align: center;">A</p> <p style="text-align: center;">B</p> | Cd <sup>2+</sup>                                       | UV-vis, fluorescence titrations, | “turn-off for A and B<br>turn-on for C | Not reported                                                                                | 5.05 × 10 <sup>-5</sup> M,<br>4.66 × 10 <sup>-5</sup> M<br>and 8.5 × 10 <sup>-6</sup> M | [10]       |

|                                                                                                                                 |                                                                                               |                                             |                |                                                                       |                                                  |                  |
|---------------------------------------------------------------------------------------------------------------------------------|-----------------------------------------------------------------------------------------------|---------------------------------------------|----------------|-----------------------------------------------------------------------|--------------------------------------------------|------------------|
| 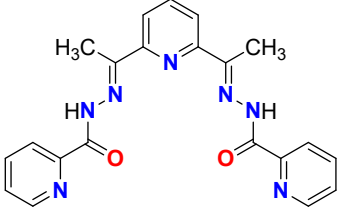 <p style="text-align: center;"><b>C</b></p>   |                                                                                               |                                             |                |                                                                       |                                                  |                  |
|                                                | <p>Hg<sup>2+</sup>,<br/>Fe<sup>2+</sup>,<br/>Pb<sup>2+</sup>,<br/>and<br/>Cd<sup>2+</sup></p> | <p>UV-vis,</p>                              | <p>-</p>       | <p>Not reported</p>                                                   | <p>0.75 nM</p>                                   | <p>[11]</p>      |
|                                               | <p>Cd<sup>2+</sup><br/>and<br/>Zn<sup>2+</sup></p>                                            | <p>fluorescence titrations</p>              | <p>turn-on</p> | <p>2.61 × 10<sup>12</sup> M<sup>-3</sup></p>                          | <p>0.13 μM</p>                                   | <p>[12]</p>      |
|                                              | <p>Cd<sup>2+</sup></p>                                                                        | <p>UV-vis,<br/>fluorescence titrations,</p> | <p>-</p>       | <p>5.21 × 10<sup>4</sup> M<sup>-1</sup><br/>(Fluorescence method)</p> | <p>68 nM</p>                                     | <p>[13]</p>      |
|                                              | <p>Cd<sup>2+</sup><br/>and<br/>Zn<sup>2+</sup></p>                                            | <p>UV-vis,<br/>fluorescence titrations,</p> | <p>turn-on</p> | <p>4.36 × 10<sup>4</sup> L mol<sup>-1</sup></p>                       | <p>5.74 × 10<sup>-7</sup> mol L<sup>-1</sup></p> | <p>[14]</p>      |
|  <p style="text-align: center;"><b>1</b></p> | <p>Cd<sup>2+</sup></p>                                                                        | <p>UV-vis,<br/>fluorescence titrations,</p> | <p>turn-on</p> | <p>5 × 10<sup>3</sup> M<sup>-1</sup><br/>(Fluorescence method)</p>    | <p>3.39 μM</p>                                   | <p>This work</p> |

## References

1. Otwinowsky, Z.; Minor, W. In: *Methods in Enzymology*; Carter, C. W., Jr., Sweet, R. M., Eds.; Academic Press: New York, 1997, 276, 307-326.
2. Sheldrick GM. (2015) SHELXT - Integrated space-group and crystal-structure determination. *Acta Cryst. A* 71, 3-8. <https://journals.iucr.org/a/issues/2015/01/00/sc5086/index.html>
3. Sheldrick GM. (1997) SHELXL-97, Program for the Refinement of Crystal Structures. University of Göttingen, Germany.
4. Sheldrick GM. (2015) Crystal structure refinement with SHELXL. *Acta Cryst. (2015)*. C71, 3–8. <https://journals.iucr.org/c/issues/2015/01/00/fa3356/index.html>
5. Waasmaier, D.; Kirfel, A. *Acta Crystallogr. A*. 1995, **51**, 416. <https://journals.iucr.org/paper?sh0059>
6. Hiscocks, J., & Frisch, M. J. (2009). Gaussian 09: IOps Reference (pp. 1-170). M. Caricato, & M. J. Frisch (Eds.). Wallingford, CT, USA: Gaussian.
7. Qian, X., Zhu, Y. Z., Song, J., Gao, X. P., & Zheng, J. Y. (2013). New donor- $\pi$ -acceptor type triazatruxene derivatives for highly efficient dye-sensitized solar cells. *Organic letters*, 15(23), 6034-6037. <https://doi.org/10.1021/ol402931u>.
8. Karuppiah, K., Malini, N., Chinnamadhayan, M., Yesudhasan, C., Sepperumal, M., Rajabathar, J. R., ... & Selvaraj, M. (2023). A novel hydrazone platform for the recognition of Cd<sup>2+</sup> and F<sup>-</sup> ions: Imaging analysis in Zebrafish embryos. *Journal of Molecular Structure*, 1282, 135152. <https://doi.org/10.1016/j.molstruc.2023.135152>.
9. Krishnaveni, K., Murugesan, S., & Siva, A. (2021). Fluorimetric and colorimetric detection of multianalytes Zn<sup>2+</sup>/Cd<sup>2+</sup>/F<sup>-</sup> ions via 5-bromosalicyl hydrazone appended pyrazole receptor; live cell imaging analysis in HeLa cells and zebra fish embryos. *Inorganic Chemistry Communications*, 132, 108843. <https://doi.org/10.1016/j.inoche.2021.108843>.
10. Danilescu, O., Bourosh, P., Kulikova, O. V., Chumakov, Y. M., Bulhac, I., & Croitor, L. (2022). Dihydrazone Schiff base ligands–appropriate chemosensors for Cd (II)

detection. *Inorganic Chemistry Communications*, 146, 110199.  
<https://doi.org/10.1016/j.inoche.2022.110199>.

11. Amin, Z., Rauf, T., Jan, Q., Kuchey, M. Y., Sofi, F. A., Ismail, T., ... & Bhat, M. A. (2023). Synthesis of a novel hydrazone functionality based spectrophotometric probe for selective and sensitive estimation of toxic heavy metal ions. *ChemistrySelect*, 8(2), e202202632.  
<https://doi.org/10.1002/slct.202202632>.

12. Wu, M., Yang, D. D., Zheng, H. W., Liang, Q. F., Li, J. B., Kang, Y., ... & Jin, L. P. (2021). A multi-binding site hydrazone-based chemosensor for Zn (II) and Cd (II): a new strategy for the detection of metal ions in aqueous media based on aggregation-induced emission. *Dalton Transactions*, 50(4), 1507-1513. <https://doi.org/10.1039/D0DT04062B>.

13. Xu, Q., Qin, W., Qin, Y., Hu, G., Xing, Z., & Liu, Y. (2024). A ratiometric fluorescence probe for visualized detection of heavy metal cadmium and application in water samples and living cells. *Molecules*, 29(22), 5331. <https://doi.org/10.3390/molecules29225331>.

14. Wang, Z., Zheng, C., Xu, D., Liao, G., & Pu, S. (2022). A fluorescent sensor for Zn<sup>2+</sup> and Cd<sup>2+</sup> based on a diarylethene derivative with an indole-2-methylhydrazone moiety. *Journal of Photochemistry and Photobiology A: Chemistry*, 424, 113634.  
<https://doi.org/10.1016/j.jphotochem.2021.113634>.
